# Supplementary material for: Light Spectral Composition Modifies Polyamine Metabolism in Young Wheat Plants
Source: MDPI journal article supplement (doi:10.3390/ijms23158394), 2022-07-29
Supplement: s1 [file s1]

**Table S1.** Primer sequences.

|                                                 |         |                         |        |                |
|-------------------------------------------------|---------|-------------------------|--------|----------------|
| <i>Ta2291</i><br><i>ADP-ribosylation factor</i> | Forward | GCTCTCCAACAACATTGCCAAC  | 165 bp | [82]           |
|                                                 | Reverse | GCTTCTGCCTGTCACATACGC   |        |                |
| <i>TaADC</i>                                    | Forward | AGGAGGAGGAGCTCGACATT    | 137 bp | [83]           |
|                                                 | Reverse | GCCGAACCTTGCCCTTCTC     |        |                |
| <i>TaPAO</i>                                    | Forward | CCAGCCTCCAGCTCCGCAAC    | 137 bp | [84]           |
|                                                 | Reverse | GCCCAGCTCCTCCACCTCGTC   |        |                |
| <i>TapxPAO</i>                                  | Forward | GCTCATAAATCAGCCCAATTCCA | 113 bp | [84]           |
|                                                 | Reverse | TTCGCCATTTGTTGAGCTCT    |        |                |
| <i>TaPUT1</i>                                   | Forward | GGTCTTCTCCCTCTTGCCTT    | 156 bp | XM_044548016.1 |
|                                                 | Reverse | GTGCTGATCGAGTCCCAGTA    |        |                |
| <i>TaPUT2</i>                                   | Forward | TTCATCGCCTTCATCAAGCTG   | 124 bp | XM_044523314.1 |
|                                                 | Reverse | TCACCACGACGATCAGGATAG   |        |                |
| <i>TaSPDS</i>                                   | Forward | AGGTATTCAAGGGTGGCGTG    | 125 bp | [64]           |
|                                                 | Reverse | TGGGTTACAGGAGTCAGGA     |        |                |
